# Supplementary material for: Submodular Dispatching with Multiple Vehicles
Source: Atypon-hosted journal article supplement (doi:10.1287/ijoc.2024.0886), 2026-02-24

Vehicles' Dispatches and Cardinalities

- Solution with 1 vehicle, 50 orders
- Solution with 2 vehicles, 67 orders
- Solution with 4 vehicles, 75 orders

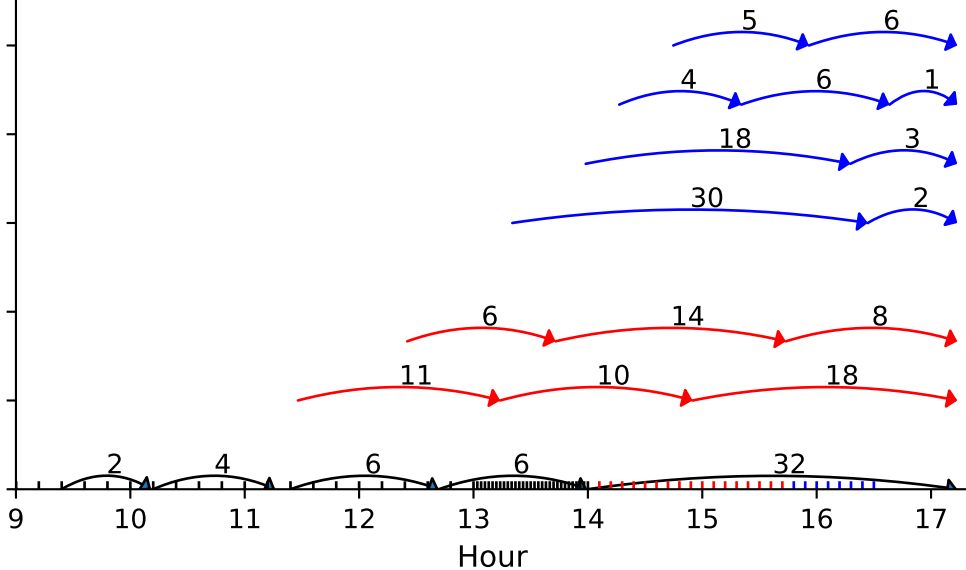

Supplement: ijoc.2024.0886.cd.zip [file fig2B_SDD_baseline_case_ii.pdf › 2024.0886-main/results/paper_figures/fig2B_SDD_baseline_case_ii.pdf]
