# Supplementary figures and images for: Submodular Dispatching with Multiple Vehicles
Source: Atypon-hosted journal article supplement (doi:10.1287/ijoc.2024.0886), 2026-02-24

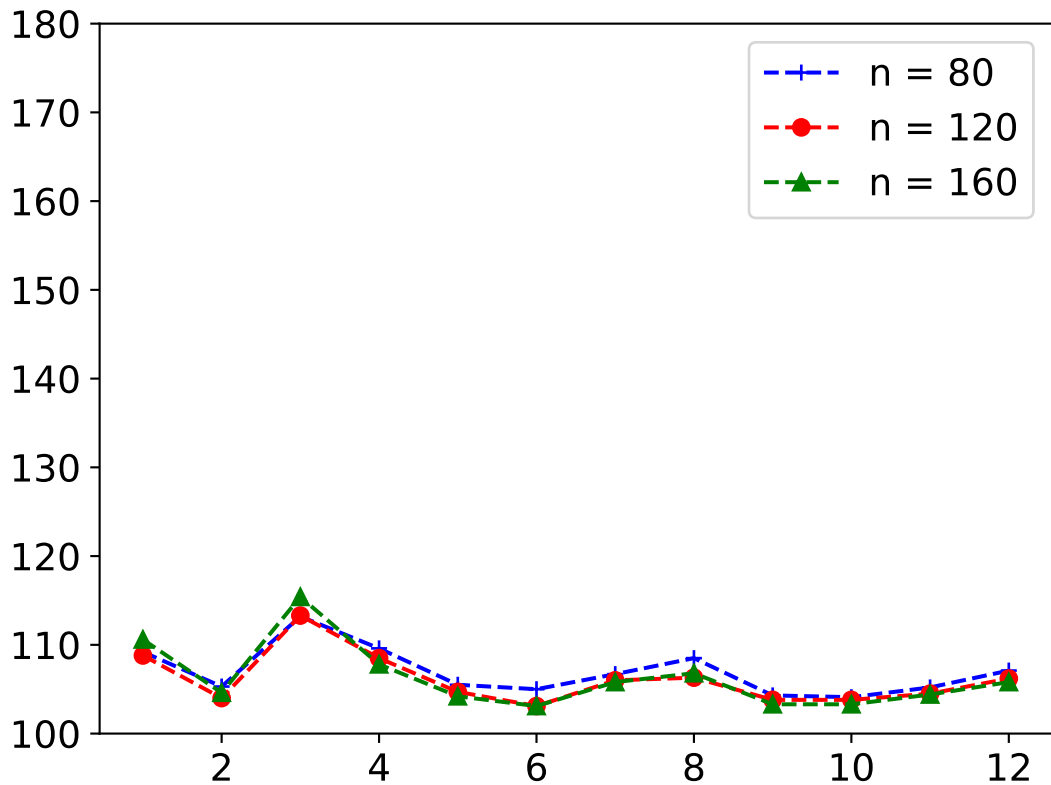

Supplement: ijoc.2024.0886.cd.zip [file fig1A_CGIP_m_equals_5.pdf › 2024.0886-main/results/paper_figures/fig1A_CGIP_m_equals_5.pdf]

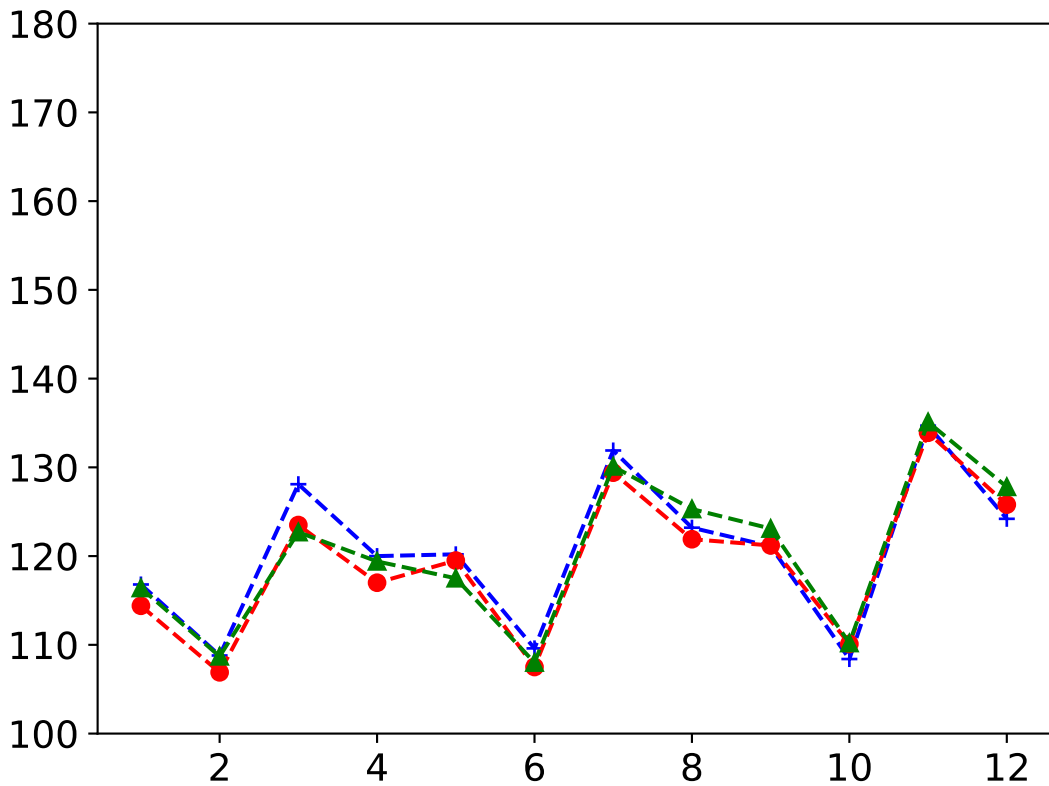

Supplement: ijoc.2024.0886.cd.zip [file fig1B_IntervalIP_m_equals_5.pdf › 2024.0886-main/results/paper_figures/fig1B_IntervalIP_m_equals_5.pdf]

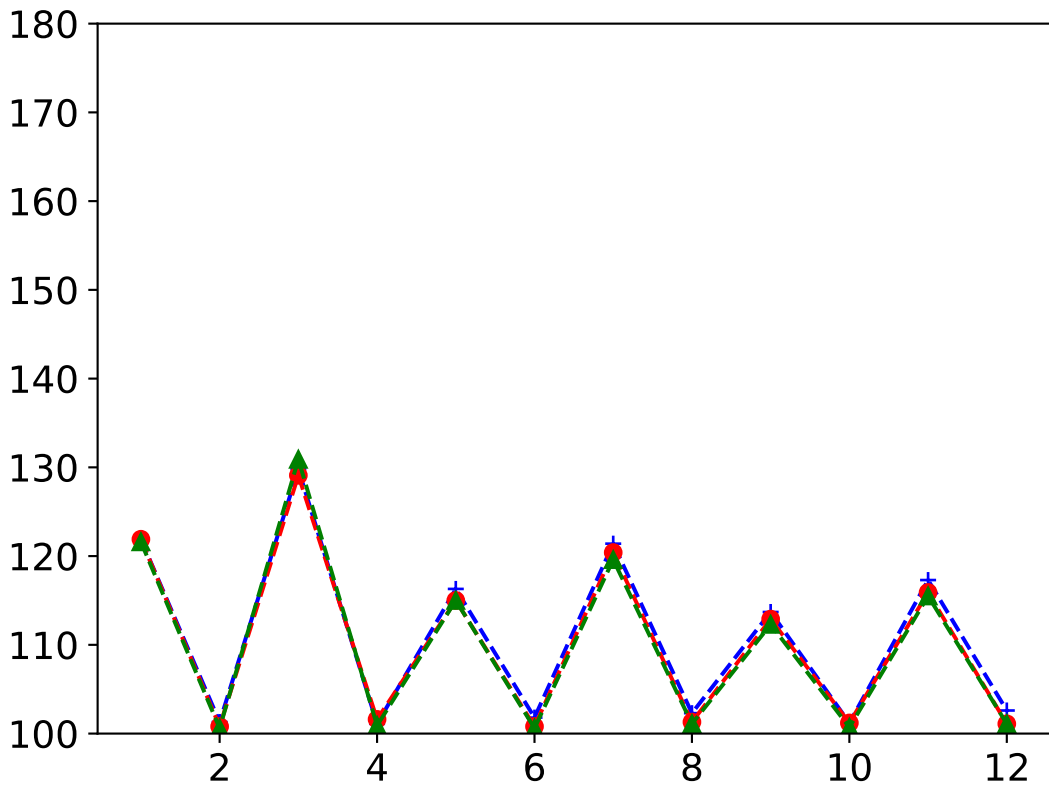

Supplement: ijoc.2024.0886.cd.zip [file fig1C_CGIP_m_equals_10.pdf › 2024.0886-main/results/paper_figures/fig1C_CGIP_m_equals_10.pdf]

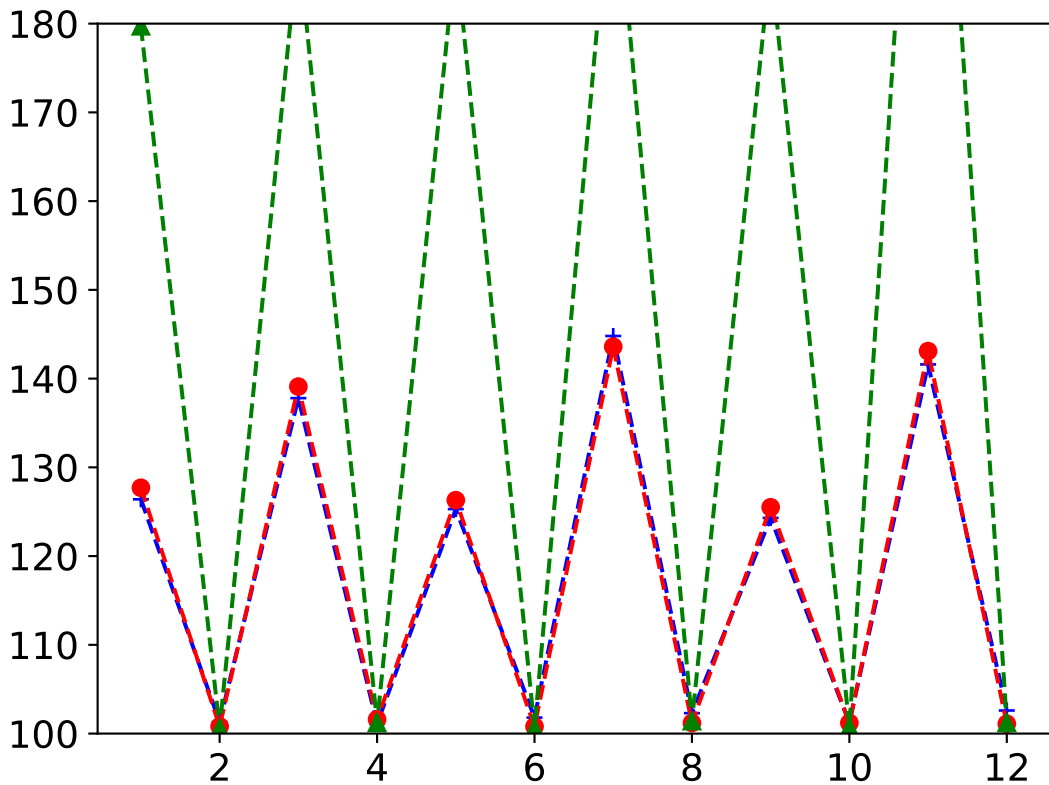

Supplement: ijoc.2024.0886.cd.zip [file fig1D_IntervalIP_m_equals_10.pdf › 2024.0886-main/results/paper_figures/fig1D_IntervalIP_m_equals_10.pdf]

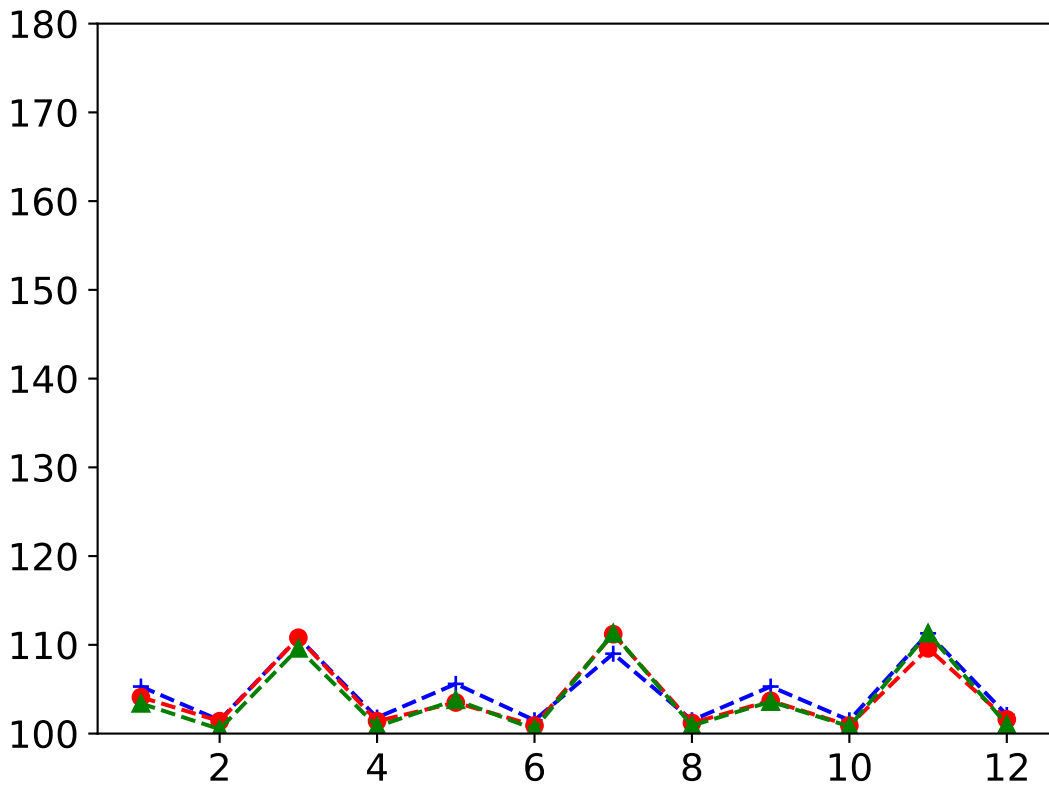

Supplement: ijoc.2024.0886.cd.zip [file fig1E_CGIP_m_equals_15.pdf › 2024.0886-main/results/paper_figures/fig1E_CGIP_m_equals_15.pdf]

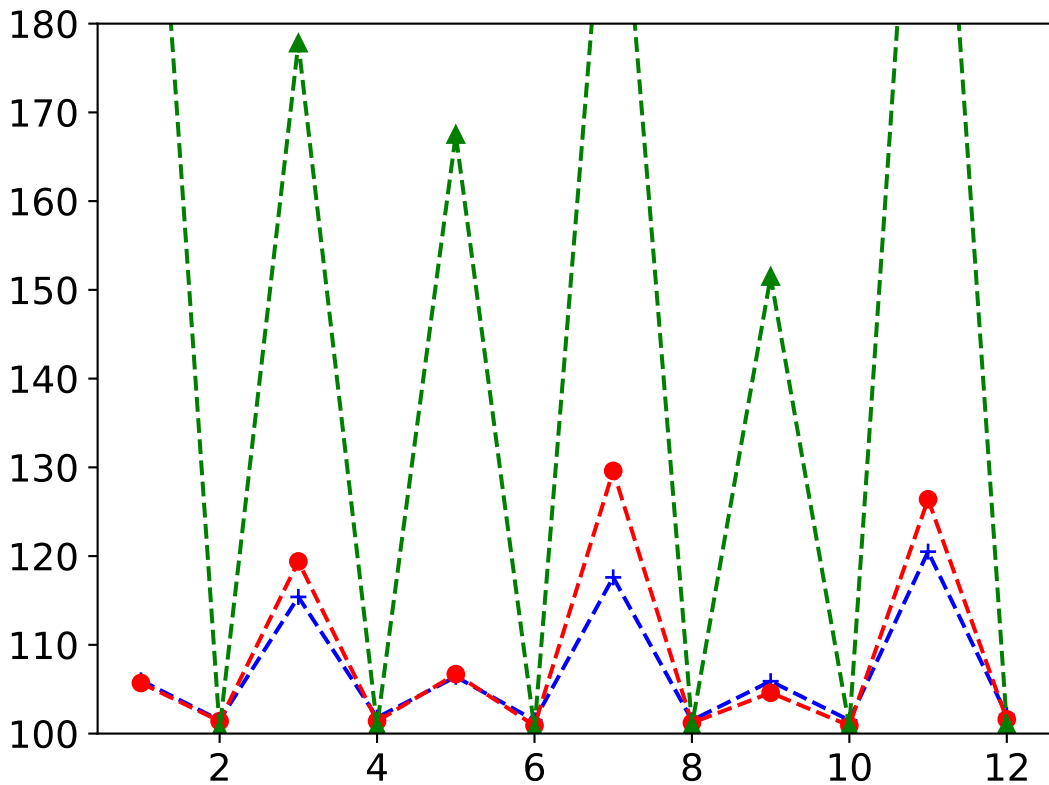

Supplement: ijoc.2024.0886.cd.zip [file fig1F_IntervalIP_m_equals_15.pdf › 2024.0886-main/results/paper_figures/fig1F_IntervalIP_m_equals_15.pdf]

Vehicles' Dispatches and Cardinalities

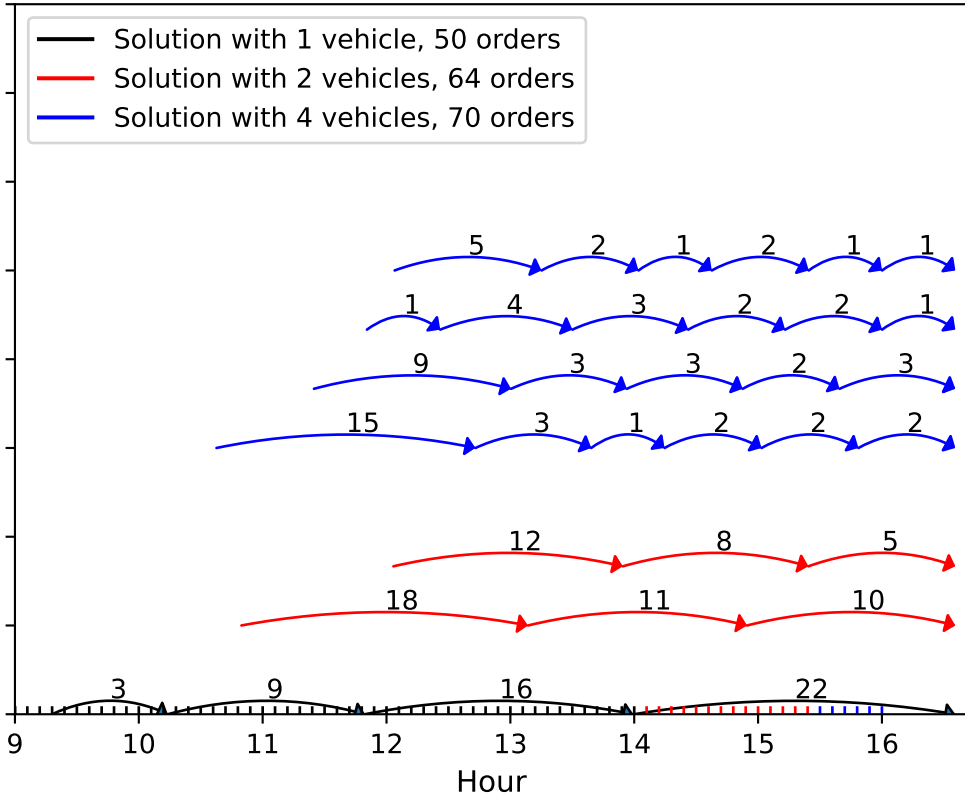

Supplement: ijoc.2024.0886.cd.zip [file fig2A_SDD_baseline_case_i.pdf › 2024.0886-main/results/paper_figures/fig2A_SDD_baseline_case_i.pdf]
